# Supplementary material for: Sustainable Education with Local-Wisdom Based Natural Reagent for Green Chemical Analysis with a Smart Device: Experiences in Thailand
Source: MDPI journal article supplement (doi:10.3390/su132011147), 2021-10-09
Supplement: s1 [file s1]

## Article

# Sustainable education with local-wisdom based natural reagent for green chemical analysis with a smart device: Experiences in Thailand

Kanokwan Kiwfo <sup>1,2</sup>, Chonnipa Yeerum <sup>3</sup>, Piyanat Issarangkura Na Ayutthaya <sup>3</sup>, Kullapon Kesonkan <sup>3</sup>, Siripat Suteerapataranon <sup>1</sup>, Piyatida Panitsupakamol <sup>4</sup>, Dujrudee Chinwong <sup>2,5</sup>, Pathinan Paengnakorn <sup>1,6</sup>, Surarong Chinwong <sup>2,5</sup>, Narong Kotchabhakdi <sup>1,7</sup>, Chalermpong Saenjurn <sup>1,2,8,\*</sup>, Monnapat Vongboot <sup>1,3,\*</sup> and Kate Grudpan <sup>1,2,9</sup>

<sup>1</sup> Center of Excellence for Innovation in Analytical Science and Technology (I-ANALY-S-T), Chiang Mai University, Chiang Mai 50200, Thailand; k.kanokwan11@gmail.com; siripat.sutee@gmail.com; pathinan.p@cmu.ac.th; kotchabhak\_n@hotmail.com; chalermpong.s@cmu.ac.th; sumalee.tan@kmutt.ac.th; kate.g@cmu.ac.th

<sup>2</sup> Cluster of Excellence on Biodiversity-Based Economic and Society (B.BES-CMU), Chiang Mai University, Chiang Mai 50200, Thailand; k.kanokwan11@gmail.com; dujrudee.c@cmu.ac.th; surarong@gmail.com; chalermpong.s@cmu.ac.th; kate.g@cmu.ac.th

<sup>3</sup> Department of Chemistry, Faculty of Sciences, King Mongkut's University of Technology Thonburi, Bangkok, 10140, Thailand; chonnipa.yeerum@gmail.com; kullapon.kesonkan@gmail.com; piyanat.tp@gmail.com; sumalee.tan@kmutt.ac.th

<sup>4</sup> Department of Pharmacy, Maharaj Nakorn Chiang Mai Hospital, Chiang Mai, Thailand; piyatida.panit@cmu.ac.th

<sup>5</sup> Department of Pharmaceutical Care, Faculty of Pharmacy, Chiang Mai University, Chiang Mai 50200, Thailand; dujrudee.c@cmu.ac.th; surarong@gmail.com

<sup>6</sup> Biomedical Engineering Institute, Chiang Mai University, Chiang Mai 50200, Thailand; pathinan.p@cmu.ac.th

<sup>7</sup> Faculty of Science, Lampang Rajabhat University, 52100, Thailand; kotchabhak\_n@hotmail.com

<sup>8</sup> Department of Pharmaceutical Sciences, Faculty of Pharmacy, Chiang Mai University, Chiang Mai 50200, Thailand; chalermpong.s@cmu.ac.th

<sup>9</sup> Department of Chemistry, Faculty of Science, Chiang Mai University, Chiang Mai 50200, Thailand; kate.g@cmu.ac.th

\* Correspondence: chalermpong.s@cmu.ac.th (C.S.); sumalee.tan@kmutt.ac.th (M.V.)

## Nat Pow Iron (G)

Natural reagent for iron determination

*developed from over 100 years local knowledge of Fang (Chiang Mai) villagers*

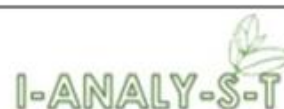

**2 grams 100 % dried guava (*Psidium Guajava*) leaves.**

### Direction for preparation of the reagent solution

- 1.prepare hot water (80-100 °C)
- 2.transfer the hot water into the provided glass bottle to the mark (60 ml)
- 3.soak this NatPow Iron (G) sachet into the hot water for 10 min
- 4.take the sachet out
5. leave the solution to room temperature

This solution serves as the reagent, for iron determination, which is referred to Iron- G (R1) in lab manual.

This solution should be able for the use of 60 runs of sets of samples.

This solution can be used at least for a week if stored in a refrigerator (5°C).

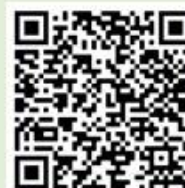

Lab manual:

This Nat Pow Iron (G) sachet was produced in lot of Lot G1100.

Each lot is characterized for the contents by fingerprint HPLC.

The HPLC chromatogram of this lot is represented below:

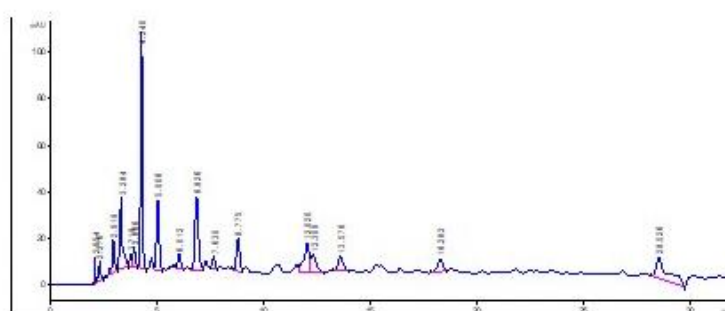

HPLC condition:  
Column C18,  
mobile phase 0.1% acetic in DI  
water/ACN,  
Flow rate 1.0 mL/min at 278 nm.

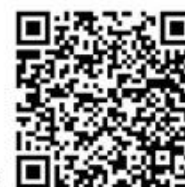

References:

This product has been developed in the Research project  
"Green Innovation in chemical analysis with Local Wisdom",  
Thailand Research Fund (TRF) Distinguished Research Professor Award  
incorporation with Center of Excellence for Innovation in Analytical Science and Technology, Chiang Mai  
University, aiming for "Local issues – Global impact – Sustainable world"

**Figure S1** instruction for the reagent preparation

Product No. Iron (G) lotG1100. T01

### NATURAL REAGENT FOR IRON DETERMINATION SET

#### Package contents:

1. 1 sachet of Nat Pow Iron (G)
2. 1 bottle BR1 for aqueous extract of the natural reagent to be used as Iron (G)-R1
3. 1 bottle BR2 containing buffer solution to be used as Iron (G) – R2
4. 1 bottle BS1 containing standard iron (III) solution (Iron (G) – S1)
5. 1 bottle BMR for preparation of mixed reagent (MR)
6. 5 bottles: BWS1, BWS2, BWS3, BWS4, BWS5 for the series of standard iron solutions 0, 2, 4, 6 and 8 ppm respectively.
7. A 96 wells microplate

#### Preparation of the reagent solution

1. prepare hot water (80-100 °C)
  2. transfer the hot water into the provided glass bottle to the mark (60 ml)
  3. soak this Nat Pow Iron (G) sachet into the hot water for 10 min
  4. take the sachet out
  5. leave the solution to room temperature
- This solution serves as the reagent, for iron determination, which is referred to Iron G (R1)

#### Preparation of mixed reagent (MR):

mix 1 volume of Iron (G)-R2 with 3 volumes of Iron (G)-R1

#### The Assay procedure

1. Add 100 µl of each iron (III) working standard solution (0, 2, 4, 6 and 8 ppm) into well of the 96 wells microplate of which position was previously labelled (as show in Figure). Similar to the sample/ unknown solutions.

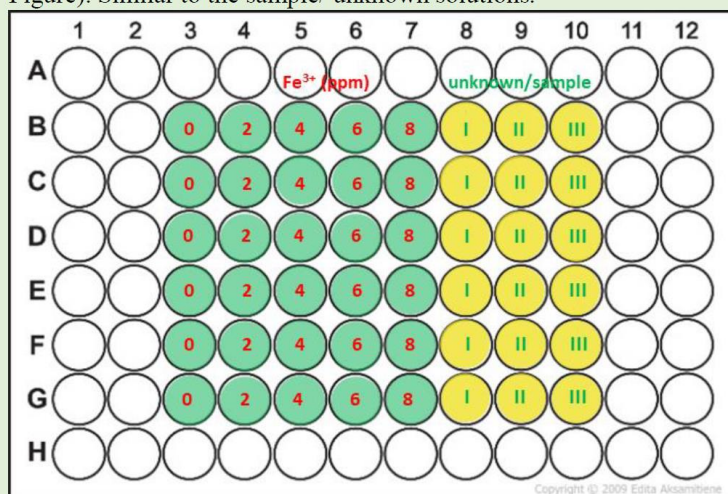

2. Add 100 µl of the mixed reagent (MR) into every well. Then stand for 10 min.
3. Measure the color appearance (dark purple) by using a smart phone with a image processing program or a smart phone application.

Figure S2 provided procedure manual

รหัสวิชา CHM 363 ปฏิบัติการเคมีวิเคราะห์โดยใช้เครื่องมือ 1 (Instrumental Methods of Chemical Analysis Laboratory I)

ภาควิชาเคมี คณะวิทยาศาสตร์ มหาวิทยาลัยเทคโนโลยีพระจอมเกล้าธนบุรี

ปฏิบัติการ: การหาปริมาณเหล็กโดยใช้รีเอเจนต์ธรรมชาติ และใช้โทรศัพท์มือถือ

(Determination of iron employing a natural reagent and with a smartphone)

#### วัตถุประสงค์การทดลอง

1. เพื่อให้นักศึกษารู้จักการหาปริมาณเหล็กด้วยวิธีสีเลอริเมตรี (determination of iron by colorimetry)
2. เพื่อให้นักศึกษาเรียนรู้เกี่ยวกับความถูกต้อง (accuracy) และความแม่นยำ (precision)
3. เพื่อให้นักศึกษาเรียนรู้เกี่ยวกับเคมีวิเคราะห์แบบสะอาด (green analytical chemistry)

#### วิธีการทดลอง

Part A: การเตรียมสารละลาย reagent สำหรับการเกิด

สารประกอบเชิงซ้อนของเหล็ก

1. นำน้ำปราศจากไอออนในขวดแก้วเทลงในบีกเกอร์ขนาด 250 mL และนำไปต้มจนมีอุณหภูมิในช่วง 80–100 °C
2. เติมน้ำปราศจากไอออนที่ต้มแล้วกลับลงในขวดแก้วเดิมจนถึงขีดวัดปริมาตร 60 mL
3. นำถุงบรรจุ reagent ออกจากถุงบรรจุภัณฑ์ แล้วนำมาแช่ในน้ำปราศจากไอออนที่ต้มแล้วในข้อ 2 ทันททีเป็นเวลา 10 นาที
4. นำถุง reagent ออกจากขวด และรอให้สารเย็นก่อนนำไปใช้งาน
5. ได้สารละลาย reagent สำหรับใช้งาน

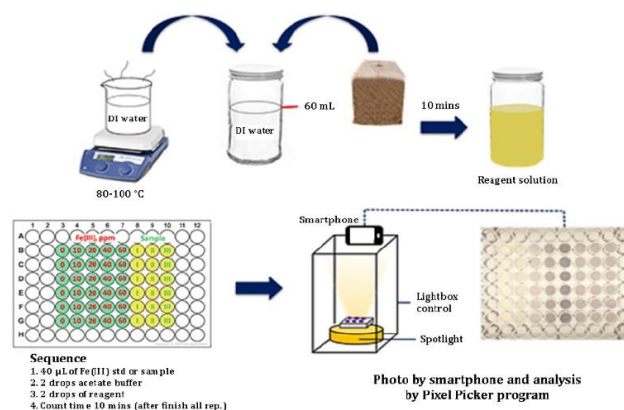

รูปที่ 1 ขั้นตอนการวิเคราะห์หาปริมาณเหล็ก

#### Part B: ขั้นตอนการวิเคราะห์หาปริมาณเหล็ก

หยด/เปิดสารละลายตามลำดับ

1. ปิเปต 40 µL ของสารละลายมาตรฐานเหล็ก(III) ความเข้มข้น 0, 10, 20, 40 และ 60 ppm ลงในภาตหลุมบริเวณสีเขียว และสารละลายตัวอย่างลงในภาตหลุมบริเวณสีเหลือง ดังผังรูปที่ 1
2. หยดสารละลายอะซิเตตฟอสฟอรัสจำนวน 2 หยดในทุกๆ หลุมทั้งกลุ่มสารละลายมาตรฐานเหล็ก (III) และกลุ่มสารละลายตัวอย่าง
3. หยดสารละลาย reagent ที่เตรียมได้จาก part A จำนวน 2 หยดในทุกๆ หลุมทั้งกลุ่มสารละลายมาตรฐานเหล็ก (III) และกลุ่มสารละลายตัวอย่าง
4. ทำขั้นตอน 1–3 ให้ครบทุกหลุมทั้งสารละลายมาตรฐานเหล็ก (III) และสารละลายตัวอย่าง เมื่อเสร็จแล้วเริ่มจับเวลาทันทีจนถึงนาทีที่ 10 จากนั้นรีบนำไปถ่ายภาพในกล่องควบคุมแสงที่เตรียมไว้ให้
5. วัดค่าความเข้มสี (color intensity) ทั้ง 3 channel ได้แก่ red (R), green (G) และ blue (B) จากภาพถ่ายผลการทดลองด้วยโปรแกรม Pixel Picker บนโทรศัพท์มือถือ
6. บันทึกค่าความเข้มสี RGB ในแอปพลิเคชัน Excel ตามตารางที่จัดไว้ให้ จากนั้นแอปพลิเคชันจะสร้างกราฟมาตรฐานความสัมพันธ์ระหว่างความเข้มข้นของสารละลายมาตรฐานเหล็ก(III) ในหน่วย ppm กับค่าความเข้มสี RGB โดยอัตโนมัติ

ข้อควรระวัง: ระวังกายาให้หยดของสารละลายมีฟอง เพราะจะทำให้อัตราส่วนผิดได้

#### การคำนวณ และการวิจารณ์ผลการทดลอง

1. สังเกตกราฟมาตรฐานความสัมพันธ์ระหว่างความเข้มข้นของสารละลายมาตรฐานเหล็ก(III) ในหน่วย ppm กับค่าความเข้มสีที่ได้จากทั้ง 3 channel ได้แก่ red, green และ blue จากนั้นพิจารณาเซลล์แนลสีที่ควรใช้ เพื่อนำไปคำนวณหาปริมาณเหล็กในสารละลายตัวอย่าง หมายเลข 1, 2 และ 3 ในหน่วย ppm
2. นำปริมาณเหล็กที่วิเคราะห์ได้มาคำนวณหาค่าความถูกต้อง (accuracy) ในเทอม %ER และความแม่นยำ (precision) ในเทอม %RSD

**Figure S3** example of the laboratory instruction modified from the provided procedure manual
